# Supplementary material
Source: PubMed Central journal article supplement (PMC3707533)
Supplement: supp_pp.113.220558_220558Supplemental_Figures.pdf [file supp_pp.113.220558_220558Supplemental_Figures.pdf]

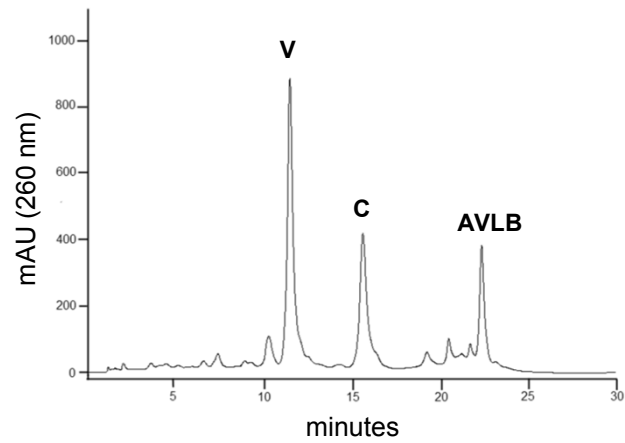

**Figure S1.** HPLC chromatogram of an alkaloid extract from *C. roseus* leaves showing the major presence of vindoline (V), catharanthine (C) and  $\alpha$ -3',4'-anhydrovinblastine (AVLB).

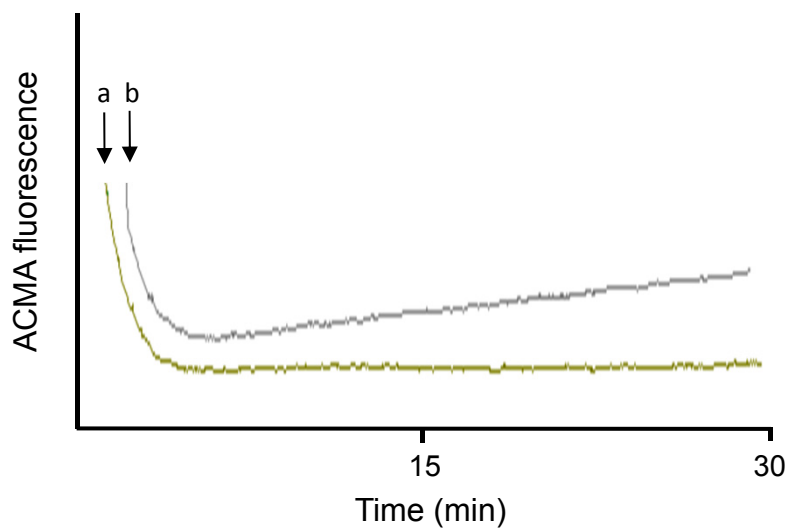

**Figure S2.** H<sup>+</sup> pumping activity in tonoplast vesicles upon addition of 1 mM of ATP in the presence (a) or in the absence (b) of an ATP regenerating system (10 mM of creatine phosphate plus 10  $\mu\text{g mL}^{-1}$  of creatine kinase). In the absence of this regenerating system, after 1 min the system can not maintain the H<sup>+</sup> gradient. The H<sup>+</sup> pumping activity was measured by the fluorescence quenching of the pH-sensitive probe ACMA.

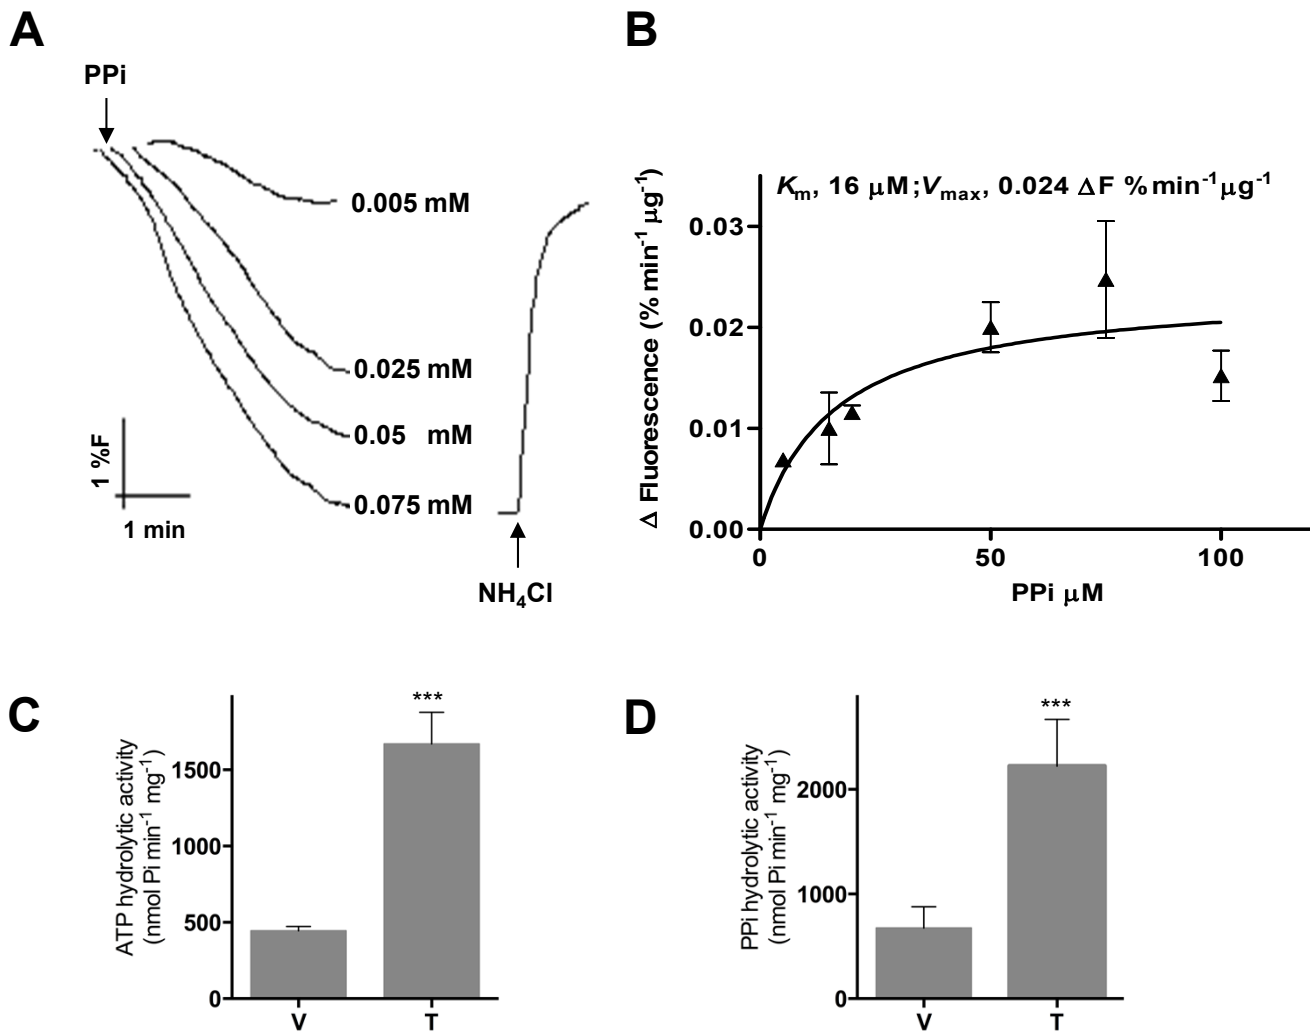

**Figure S3.** Pumping activities of V-H<sup>+</sup>-PPase in tonoplast vesicles and ATP and PPI hydrolytic activities in vacuoles and tonoplast vesicles isolated from *C. roseus* leaves. A, H<sup>+</sup> pumping activity in tonoplast vesicles upon addition of PPI, measured by the fluorescence quenching of the pH-sensitive probe ACMA. B, Michaelis-Menten plot of the initial rates of proton pumping in A. Error bars indicate SD (n = 3). C, ATP hydrolytic activity of intact vacuoles (V) and tonoplast vesicles (T), in the presence of the P-H<sup>+</sup>-ATPase inhibitor vanadate (100 μM) and the F-H<sup>+</sup>-ATPase inhibitor azide (5 mM), to detect only the V-H<sup>+</sup>-ATPase activity. D, PPI hydrolytic activity of intact vacuoles (V) and tonoplast vesicles (T). Statistical significance was evaluated using Student's *t* test for pairwise comparison (\*\*\*) P < 0.001). Data significantly different are indicated. Error bars indicate SD (n = 3).

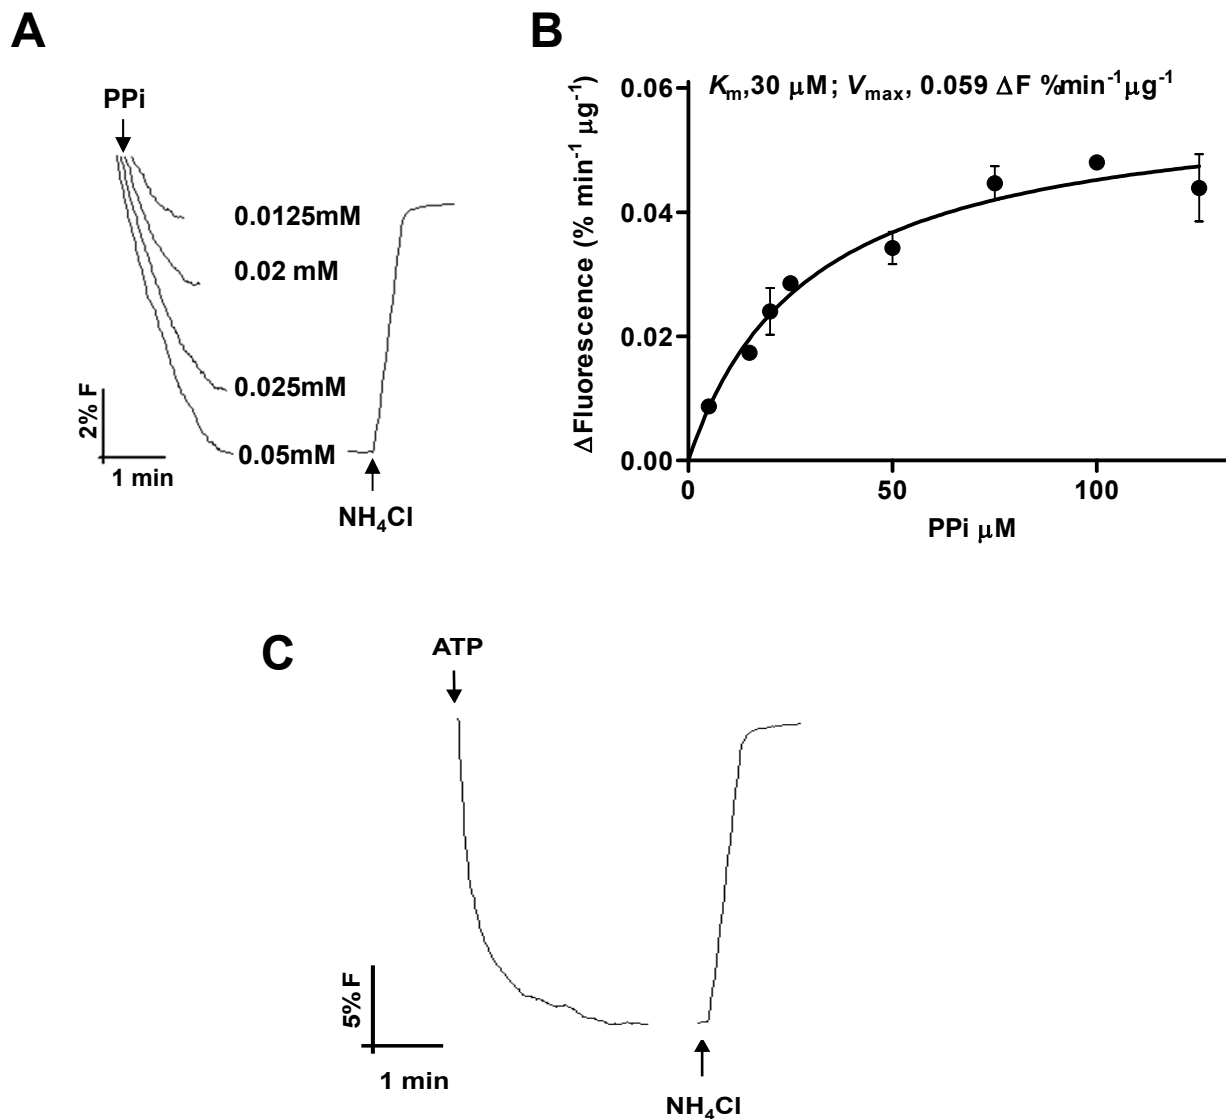

**Figure S4.** Pumping activity of V-H<sup>+</sup>-PPase and V-H<sup>+</sup>-ATPase in intact vacuoles from *C.roseus* leaves. A, H<sup>+</sup> pumping activity in intact vacuoles upon addition of PPI, measured by the fluorescence quenching of the pH-sensitive probe ACMA. B Michaelis-Menten plot of the initial rates of proton pumping in A. C, H<sup>+</sup> pumping activity in intact vacuoles upon addition of ATP, measured by the fluorescence quenching of the pH-sensitive probe ACMA. Error bars indicate SD (n = 3).
